# Supplementary material for: An easily modified method using FeCl3 to synthesize nanoporous gold with a high surface area
Source: Royal Society of Chemistry journal article supplement (doi:10.1039/c7ra01862b), 2017-01-01
Supplement: c7ra01862b1.pdf [file c7ra01862b1.pdf]

# An Easily-Modified FeCl<sub>3</sub> Method Used to Synthesize Nanoporous Gold with High Surface Area

Kenan Shao<sup>a</sup>, Chun Fang<sup>a</sup>, Yinfang Yao<sup>a</sup>, Canyon Zhao<sup>a</sup>, Zhi Yang<sup>a</sup>, Jianguo Liu<sup>ab\*</sup> and Zhigang Zou<sup>ab\*</sup>

*a* Jiangsu Key Laboratory for Nano Technology, National Laboratory of Solid State Microstructures, College of Engineering and Applied Sciences, and Collaborative Innovation Center of Advanced Microstructures, Nanjing University, 22 Hankou Road, Nanjing 210093, China. E-mail: jianguoliu@nju.edu.cn, zgzou@nju.edu.cn

*b* Kunshan Innovation Institute of Nanjing University, Kunshan Sunlaite New Energy Co., Ltd. 1699 South Zuchongzhi Road, Kunshan, Suzhou, 215347, China

**Table S1.** The distribution of the mean pore size and Ag content (at. %) of NPG-N, NPG-H, NPG-HP and NPG-EG.

| Samples | Mean pore size (nm) | Ag content (at. %) |
|---------|---------------------|--------------------|
| NPG-N   | 23.6                | <=5                |
| NPG-H   | 25.4                | 6.8                |
| NPG-HP  | 10.8                | 20.6               |
| NPG-EG  | 8.2                 | 14.9               |

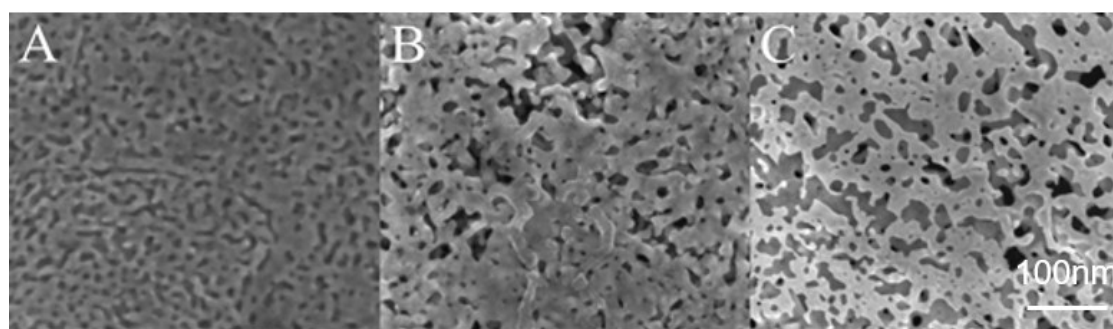

**Figure. S1** Nanoporous gold leaf synthesized by a) 0.2 M FeCl<sub>3</sub>, 30 °C, 1h, b) 1.5M FeBr<sub>3</sub>, 30 °C, 1h and c) 1.0M CuCl<sub>2</sub>, 70 °C, 1h.

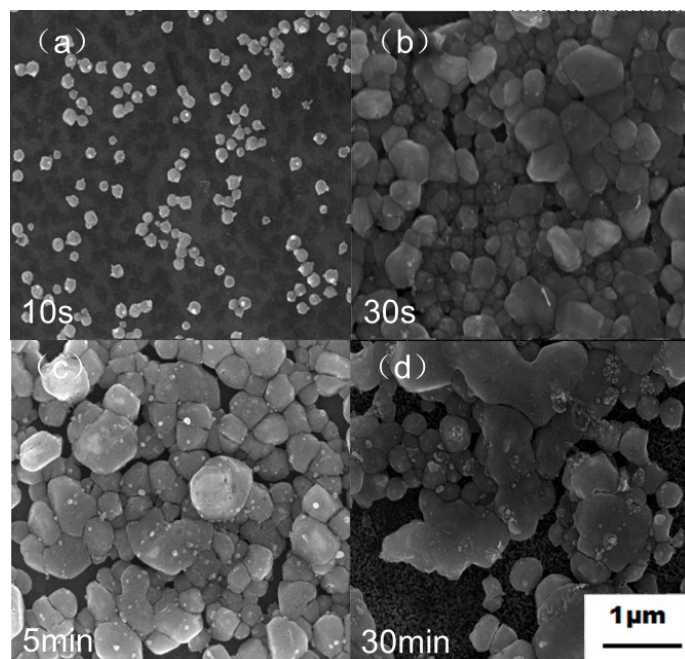

**Figure. S2** (a) - (d) SEM images of plane section (made by 400nm thick Au-Ag alloy) at different etching time in 2M FeCl<sub>3</sub> solution.

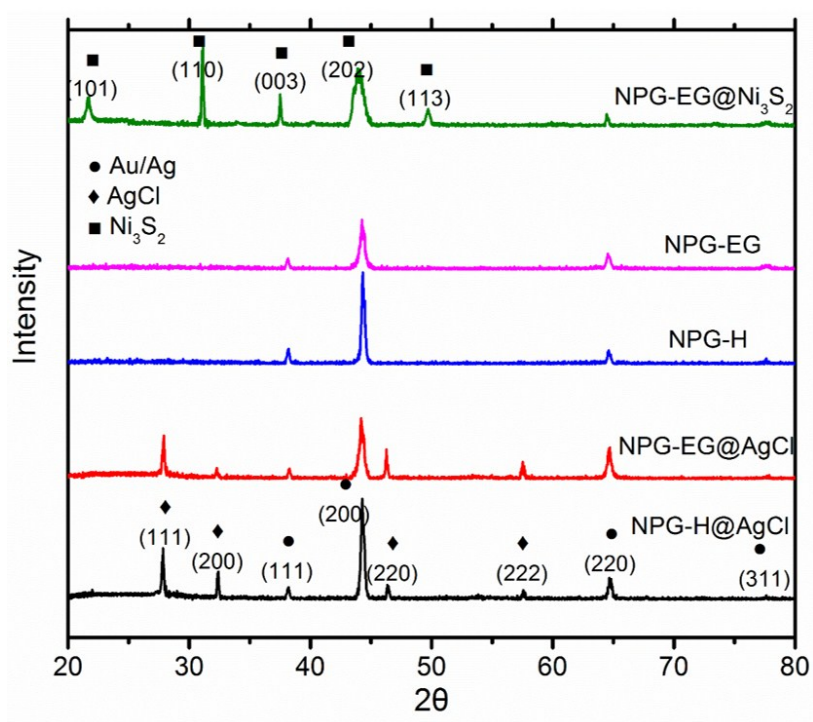

**Figure. S3** The X-ray diffraction patterns of NPG-H@AgCl, NPG-EG@AgCl, NPG-H, NPG-EG and NPG-EG@Ni<sub>3</sub>S<sub>2</sub>, respectively.

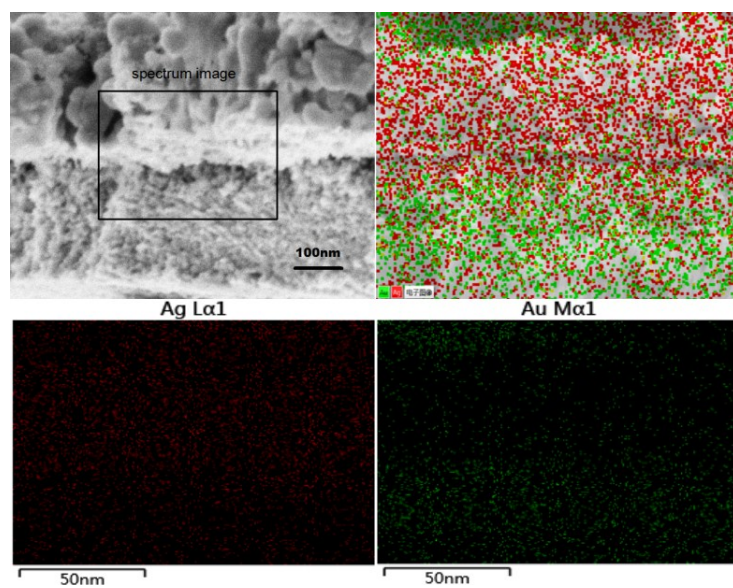

**Figure. S4** SEM mapping of cross section selected from NPG@AgCl with an etching time of 30s. Red and green points represent Ag particles and Au atoms, respectively.

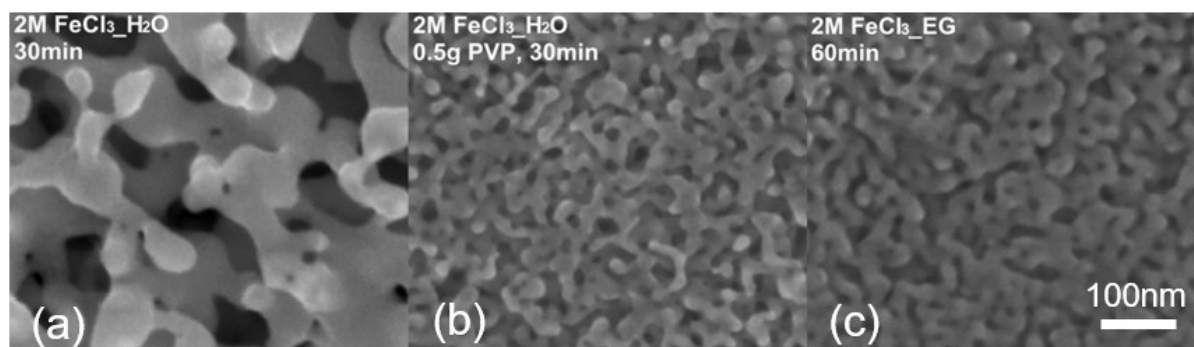

**Figure. S5** SEM images of (a) NPG-H, (b) NPG-HP and (c) NPG-EG and reaction temperature was 30°C. PVP and EG can both remarkably attenuate the ligament size of nanoporous structure.

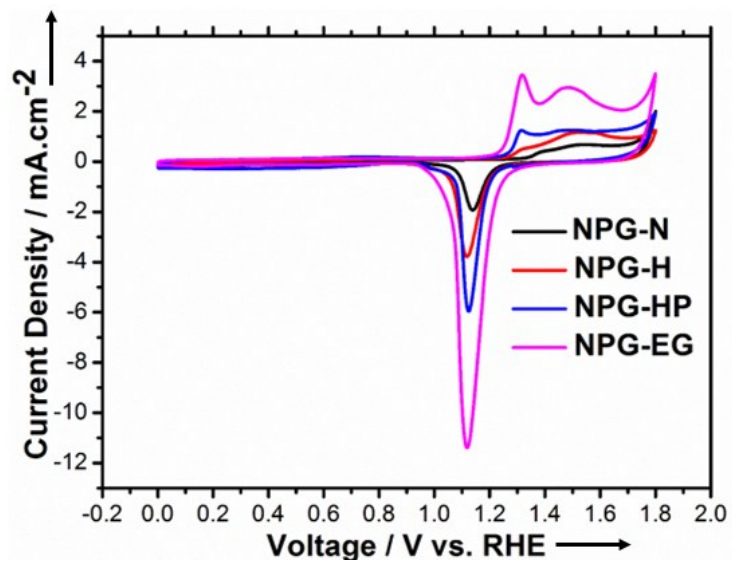

**Figure. S6** The cyclic voltammogram of NPG-N, NPG-H, NPG-HP and NPG-EG electrodes in 0.1M HClO<sub>4</sub> solution at a scan rate of 50mV.s<sup>-1</sup>

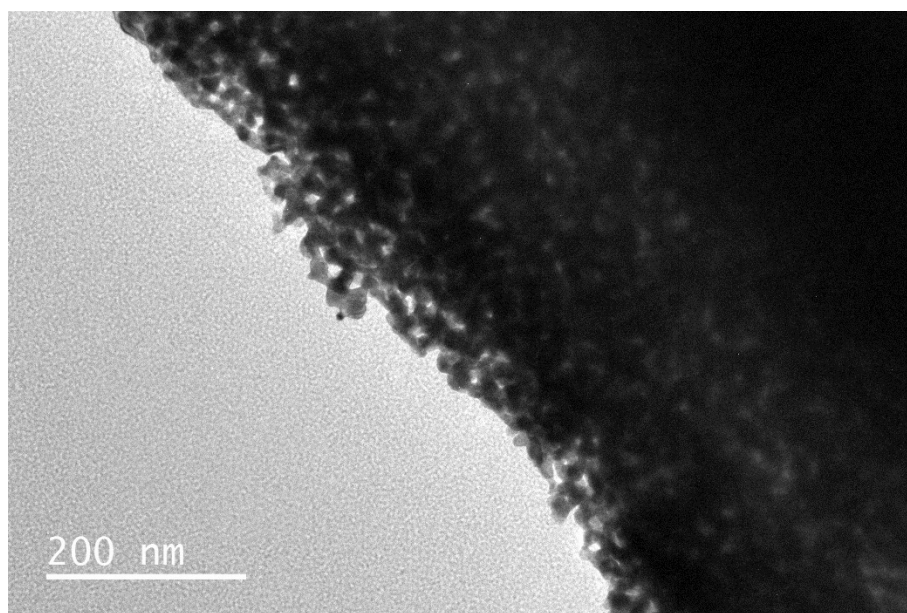

**Figure. S7** The TEM image of NPG-EG@Ni<sub>3</sub>S<sub>2</sub> with lower resolution.
